# Supplementary material
Source: publisher figshare collection journal article supplement (https://asha.figshare.com/ndownloader/files/31913297)
Supplement: Supplementary file 1 [file 31913297]

1. The mailman patted himself on the head and the teacher in the same room did too for no good reason.
2. The cowboy washed himself with soap and the boy from the house next door did too on the driveway.
3. The doctor sprayed himself with a hose and the truck driver from the house next door did too for a long time.
4. The lawyer touched himself on the nose and the scientist from the famous school did too during lunchtime.
5. The mother tickled herself with a feather and the nurse from the local school did too because it was funny.
6. The dentist scared himself in the room and the chef from the old building did too every once in awhile.
7. The basketball player sheltered himself from the rain and the astronaut from the same town did too in the afternoon.
8. The actor saw himself in the mirror and the artist from the department store did too early in the morning.
9. The baby hugged herself for a long time and the golfer from California did too whenever the chance occurred.
10. The janitor untangled himself from the rope and the fireman in the elementary school did too after the accident.
11. The bodyguard examined himself for bruises and the policeman in the public park did too for five minutes.
12. The writer complimented herself on a job well done and the dancer with the large party did too very late at night.
13. The photographer knocked himself on the head and the bus driver from the house next door did too late in the day.
14. The soccer player fed herself with a spoon and the woman from the same town did too because there were no forks.
15. The ice skater bit herself on the hand and the hairdresser from the dazzling show did too though it was an accident.
16. The secretary rubbed herself on the arm and the ballerina in the grocery store did too after the bug swarm passed by.
17. The tennis player burned himself with a candle and the salesperson from the same town did too late at night.
18. The gymnast hit herself on the head and the babysitter from the house next door did too because it was dark.
19. The student kissed herself on the hand and the cowgirl from the university did too because it was tradition.
20. The taxi driver banged himself on the head and the father of the quirky kid did too though it was an accident
21. The nun poked herself in the eye and the actress in a local store did too though it was an accident.
22. The runner kicked himself in the leg and the biker from the new building did too because it was fun.
23. The waitress stroked herself on the cheek and the animal trainer from the house next door did too late one evening.

24. The monk punched himself in the ribs and the barber on the street corner did too late in the afternoon.
25. The grandmother scratched herself on the shoulder and the teenager from across the street did too after the mosquitoes were out.
26. The model pinched herself on the cheek and the receptionist from down the street did too late one afternoon.
27. The baseball player cleaned himself with a sponge and the veterinarian from down the block did too around dinnertime.
28. The young child dried himself with a towel and the lifeguard with a crew cut did too around lunchtime.
29. The cheerleader searched herself for insect bites and the little girl from the local school did too after playing in the park.
30. The judge inspected himself for cuts and the television reporter in the same room did too during the interview.
31. The gardener rinsed himself with a hose and the hiker in the hot sun did too after a long hard day.
32. The garbage collector splashed himself with water and the auto mechanic on the street corner did too while playing in a pool.
33. The baker wiped himself with a towel and the camp counselor in the same room did too after the accident.
34. The librarian covered herself with a sunshade and the athlete from the house next door did too while out sightseeing.
35. The acrobat squirted herself with cold water and the beekeeper in the burning sun did too because it was so hot.
36. The cake decorator coated herself with suntan lotion and the painter on the famous beach did too because it was a sunny day.
37. The airline stewardess sprinkled herself with snowflakes and the swimmer from down the street did too during the last snowfall.
38. The captain splattered himself with paint and the guitar player from the same neighborhood did too though it was an accident.
39. The sister spattered herself with paint and the hostess in the same room did too because it was fun.
40. The entertainer drenched himself with water and the security guard from the house next door did too because it was so hot.
